1 **Investigating the potential of packed cell volume for**  
2 **deducing hemoglobin: Cholistani camels in perspective**

3 **Umer Farooq<sup>1</sup>, Musadiq Idris<sup>1</sup>, Nouman Sajjad<sup>1</sup>, Mushtaq Hussain Lashari<sup>2</sup>, Shahbaz**  
4 **Ahmad<sup>2</sup>, Zia-Ur-Rehman<sup>1</sup>, Haroon Rashid<sup>1</sup>, Aisha Mahmood<sup>1</sup>, Sajid Hameed<sup>3</sup>**

5

6 <sup>1</sup>Department of Physiology, The Islamia University of Bahawalpur, Pakistan; <sup>2</sup>Department of Zoology,  
7 The Islamia University of Bahawalpur, Pakistan, <sup>3</sup>Department of Anatomy and Histology, The Islamia  
8 University of Bahawalpur, Pakistan

9

10

11 \*Correspondence: [umer.farooq@iub.edu.pk](mailto:umer.farooq@iub.edu.pk)

## 12 **Abstract**

13 In human medical practice, a hematological rule of three has been validated for healthy human  
14 populations. One such formula is estimating hemoglobin (Hb) levels as  $1/3^{\text{rd}}$  of Packed Cell  
15 Volume (PCV). However, no such hematological formulae have been devised and validated for  
16 veterinary medical practice. The present study was devised with an aim to evaluate the  
17 relationship between hemoglobin (Hb) concentration and Packed Cell Volume (PCV) in camels  
18 (n=215) being reared under pastoralism, and to devise a simple pen-side hematological formula  
19 for estimation of Hb from PCV. The PCV was determined through microhematocrit method  
20 whereas Hb estimation by cyanmethaemoglobin method (HbD). The Hb was also calculated as  
21  $1/3^{\text{rd}}$  of PCV and was dubbed as calculated Hb (HbC). Overall HbD and HbC were significantly  
22 ( $P \geq 0.05$ ) different. Similar results were attained for all study groups *i.e.* males (n=94) and  
23 females (n=121), and young (n=85) and adult (n=130) camels. The corrected Hb (CHb) was  
24 deduced through regression prediction equation attained from linear regression model. Scatter-  
25 plots were drawn, linear regression was carried out, and Bland Altman chart was built for  
26 agreement of both methods of Hb estimation. A non-significant ( $P \geq 0.05$ ) difference was noticed  
27 between HbD and CHb. Bland Altman chart revealed good agreement between HbD and CHb  
28 and there was no proportional bias on the distribution of data around the mean difference line  
29 (Mean= 0.1436, 95% CI= 3.00, -2.72). We accordingly recommend a simplified pen-side  
30 hematological formula for deducing Hb concentration from PCV *viz.* Hb concentration (g/dL)=  
31  $0.18(\text{PCV})+5.4$  for all age and gender groups of camels instead of its calculation as one-third of  
32 PCV.

33 **Keywords:** packed cell volume; hemoglobin; Cholistani camels

34

## 35 **Introduction**

36 Packed Cell Volume (PCV), also well-known as hematocrit or erythrocyte volume fraction, is  
37 fraction of red blood cells (RBCs) in the animal's blood [1]. PCV is responsible for  
38 transportation of oxygen and absorbed nutrients [2]. Amplified PCV not only results in a better  
39 transportation but also an augmented primary and secondary polycythemia [3]. Moreover, a high  
40 PCV reading pointed out either an increased number of RBCs or decreased volume of circulating  
41 plasma. PCV is the most precise way of estimating erythrocyte volume and may also be used to  
42 assume total blood volume and hemoglobin (Hb) level.

43 The manual, spun PCV (through microhematocrit method) is a key measurement,  
44 underpinning much of hematology. The calibration of virtually all hematology autoanalyzers can  
45 be traced in some way back to the PCV [4]. Reference ranges for the hematocrit and red cell  
46 indices depend on the validity of this calibration, as do the assignment of expected values to  
47 calibrators and controls, and the assignment of target values for statistical population-based  
48 quality control programs. Any errors in PCV assignment have far-reaching implications [5].

49 Extensive research work has been conducted in human medical sciences directed towards  
50 assessing an interrelationship between PCV and Hb, and confirming the thumb rule of Hb being  
51  $1/3^{\text{rd}}$  of PCV. Certain studies have nullified this rule claiming that Hb estimates cannot be  
52 obtained from PCV values with a reliable precision by making use of the common rule of  
53 dividing by three [6, 7, 8]. The results of these studies also indicated that the association between  
54 Hb and PCV is not exactly three times and the sex and age of the individuals can also have a  
55 significant effect on this three-fold conversion.

56 For veterinary medical sciences, the interrelationship between PCV and Hb has been  
57 studied for indigenous cattle [9]. In this study assessing Hb as 1/3<sup>rd</sup> of PCV has been nullified  
58 and a newer alternative formula has been reported for Hb assessment through PCV. Similarly,  
59 our laboratory has reported similar reports and pen-side hematological formulae for Hb  
60 estimation for goats [10] and Cholistani breed of cattle [11]. However, study on such  
61 interrelationship for the blood of camels has not yet been reported. The present novel study has  
62 therefor been devised with an aim of evaluating the relationship between Hb concentration and  
63 PCV in Cholistani camels being reared under pastoralism in Cholistan desert of Pakistan.  
64 Furthermore, it also aims to devise a simple pen-side hematological formula for estimation of Hb  
65 from PCV.

## 66 **Materials and Methods**

### 67 **Geo-location of the Study**

68 The study was simultaneously conducted at Cholistan desert, Pakistan (for field blood sampling)  
69 and Physiology post-graduate lab of the Department of Physiology, The Islamia University of  
70 Bahawalpur (IUB), Pakistan (for lab work). Cholistan desert is located at latitudes 27°42' and  
71 29°45' North and longitudes 69°52' and 75°24' East and at an altitude of 112m above the sea level.  
72 The climate of this area is arid, hot subtropical and monsoonal with the average annual rainfall of  
73 180 mm. The mean annual temperature is 28.33°C, with the month of June being the hottest  
74 when the daily maximum temperature normally exceeds 45°C [12, 13].

### 75 **Experimental Animals**

76 Cholistani camels (n=215) were randomly selected from nomadic pastoralists for blood sampling  
77 irrespective of their age and sex. All the animals were being reared under similar management  
78 and feeding conditions of pastoralism either under transhumanie or nomadic pastoral livestock

79 production systems [14]. Split-herding is normally exercised for livestock by the pastoralists,  
80 according to which the young ones (calves in this case) are kept at their pens near the ‘Tobas’  
81 (natural or man-made water reservoirs of the desert), while the adults are sent for grazing till  
82 night-time [12]. The general health status of animals was ascertained through a thorough  
83 anamnesis from the livestock owners and clinical signs. The animals which were found to be  
84 lethargic, depressed, off-feed and segregated from the herd (as per the anamnesis taken from the  
85 pastoralist herders) were not included in the study.

### 86 **Blood Collection**

87 The blood sampling was conducted from July to October, 2022. About 5 mL blood was collected  
88 aseptically in anticoagulant-added tubes (0.5 M EDTA) with the help of a disposable syringe  
89 from the high neck jugular vein of each animal. The same restraining technique with same  
90 personnel and time were used to minimize the stress in animal and also to normalize blood  
91 collection procedure. The blood samples were mixed by gentle inversion and transported in an  
92 ice box to the Physiology Post-graduate Lab, IUB, Pakistan, refrigerated and analyzed within  
93 24h for hematological analyses.

### 94 **Hematological Analyses**

95 The blood samples were analyzed for PCV and Hb as per the protocols prescribed by the WHO  
96 and in vogue, and are considered as gold standard tests for PCV and Hb determination,  
97 respectively [1]. PCV was deduced by microhematocrit centrifuge method using microcentrifuge  
98 (Sigma Aldrich, Model 5254, Germany) and reading as percentage (%) was taken through a  
99 hematocrit card-reader. The reading was used for calculating Hb as its third and was dubbed as  
100 Hemoglobin Calculated (HbC).

101 The Hb concentration was also determined through Drabkin's reagent (HbD) using  
102 cyanmethaemoglobin method and a commercial Hb Kit (AMP Diagnostics, BD6100-E V4.0-CE  
103 Ameda Labordiagnostik GmbH, Germany) [15]. The Hb was calculated as per formula  
104 prescribed in instructions manual.

### 105 **Statistical Analyses**

106 Statistical Package for Social Science (SPSS for Windows version 12, SPSS Inc., Chicago, IL,  
107 USA) was used for data analysis. Means ( $\pm$ SE) and 95% CI for hematological attributes (PCV  
108 and Hb) were computed using prescribed formulae. For the purpose of analyses, considering the  
109 non-normal nature of the attained data, the Mann Whitney-U test was implied as a non-  
110 parametric test for deducing difference between HbD and HbC, and between HbD and corrected  
111 Hb (CHb) for all study groups (young= 85, adult= 130; females= 121, males= 94).

112 Linear regression analyses were carried out, scatter-plots were drawn between the  
113 following as prescribed earlier and Bland Altman test was implied [9, 16]:

- 114 a) HbD and PCV
- 115 b) HbD and HbC
- 116 c) The difference of HbD and CHb (HbD-CHb), and means of measurements (HbD+CHb/2)

117 Regression prediction equations were accordingly computed. Attaining a highest adjusted  
118 r-square value from these equations, CHb was calculated.

### 119 **Results**

120 In the present study, hemoglobin determined spectrophotometrically (HbD) and hemoglobin  
121 calculated (HbC) as one third of Packed Cell Volume (PCV) was assessed for statistical

122 difference at  $P \leq 0.05$ . Furthermore, PCV conducted through microhematocrit method was studied  
123 for interrelationship between the HbD and corrected hemoglobin (HbC) (through a formula  
124 attained by regression analyses).

125         Regarding normality of studied attributes (HbD, PCV and HbC), the Shapiro-Wilk test  
126 revealed that all the three studied attributes were not distributed normally.

127         Mean ( $\pm$ SE) values and 95% CI for hematological attributes (HbD, HbC and PCV) in  
128 Cholistani camels ( $n=215$ ) are presented in Table 1. The overall results indicated a significant  
129 ( $P \leq 0.05$ ) difference between HbD and HbC. Furthermore, similar results were attained for all  
130 study groups (females *vs* males, and adults *vs* young) of the present study.

131         The results for linear regression for all study groups are presented in Table 2.  
132 Significantly ( $P \leq 0.01$ ) higher positive correlation coefficient was noticed for young camels  
133 ( $r=0.830$ ; adjusted r-square= $0.68$ ) between HbD and PCV, and between HbD and HbC.

134         Regression equations were developed to validate the  $1/3^{\text{rd}}$  association between PCV and  
135 HbD for all study groups. The overall results regression equation hence attained *i.e.*  $\text{Hb (g/d)} =$   
136  $0.18(\text{PCV}) + 5.4$  was used to deduce Hb dubbed as corrected Hb (CHb). A non-significant  
137 ( $P \geq 0.05$ ) difference was noticed between HbD and CHb. This equation is therefore, considered  
138 valid for deducing Hb from PCV in all age and gender groups of Cholistani camels.

139         The scatterplots of spectrophotometrically determined Hb (HbD) versus PCV, and HbD  
140 versus hemoglobin calculated as  $1/3^{\text{rd}}$  of PCV (HbC) have been given in Figure 1 (a,b).  
141 Similarly, the scatterplots and Bland and Altman Chart for difference between HbD and CHb  
142 (HbD-CHb) versus average of HbD and CHb ( $\text{HbD} + \text{CHb} / 2$ ) is given in Figure2. Bland Altman

143 chart revealed good agreement between HbD and CHb and there was no proportional bias on the  
144 distribution of data around the mean difference line (Mean= 0.1436, 95% CI= 3.00—2.72).

## 145 **Discussion**

146 In Pakistan, livestock is a sub-sector of agriculture and puts in about 56% to the agriculture value  
147 added services and almost 11% to the Gross Domestic Product (GDP). Pakistan has a large  
148 livestock population, well adapted to the local climatic conditions and has some of the best  
149 tropical dairy breeds. The livestock population in Pakistan comprises of about 53.8 million goats,  
150 29.6 million cattle, 27.3 million buffalo, 26.5 million sheep and 0.9 million camels [17]. Despite  
151 of the fact that vegetation and the resources have been depleted, the livestock population is on  
152 the boom with the succession of years [12]. Cattle, sheep, goats and camels are the predominant  
153 types of livestock and the total population of livestock in Cholistan desert was estimated to be  
154 12, 09, 528 heads, comprising of 47% cattle, 30% sheep, 22% goats and 1% camels [17]. In  
155 tropical pastoral system, in addition to shortage and poor quality of foodstuff, the decrease in the  
156 productive and reproductive potential of livestock can also be ascribed to the incidence of  
157 infections such as helminthiasis, trypanosomiasis, theileriosis, tick burden and tick borne  
158 infectivity. The parasitic infestation is one of the most important reasons of disease and  
159 production loss in the livestock by causing anemia and mostly death in heavily infected animals  
160 [18, 19, 20, 21]. Normally, for the diagnosis of anemia, PCV and Hb levels of the blood  
161 picture/complete blood count (cbc) are considered valid enough. In resource-poor settings (such  
162 as in Pakistan), automated veterinary hematology analyzers are not available. And human blood  
163 analyzers are usually being used for blood of livestock [22]. This poses the threat of erroneous  
164 results as the human analyzers are differently validated than the veterinary hematology analyzers  
165 [23]. This endorses the vitality of gold standard tests such as microhematocrit method (for PCV)



166 and cyanmethemoglobin method (for Hb levels) [4, 15]. The present study included these two  
167 gold standard methods for deducing PCV and Hb in camel blood, and after attaining appropriate  
168 interrelationship between these attributes, puts forth a simple, pen-side hematological formula of  
169  $Hb (g/dL) = 0.18(PCV) + 5.4$  for estimating Hb from PCV.

170 Considering the ‘hematological rule of three’ which is being implied in human medical  
171 practice, it has been well elucidated that Hb can be estimated as 1/3<sup>rd</sup> of the PCV for apparently  
172 healthy human populations having normocytic normochromic erythrocytes [2, 24, 25]. On  
173 similar grounds, some studies on human blood have also negated the validity of this convention.  
174 In a malaria-endemic setting, this convention was not found valid in children and it was  
175 concluded that age, gender, season of sampling and physiological status of humans affects  
176 relationship between Hb concentration and PCV [7]. It was hence dubbed impossible to deduce a  
177 validated mathematical formula for their relationship as shown by other studies as well [6]. The  
178 earlier study dates back to 1994 which was conducted on human blood and endorsed that Hb was  
179 accurately measured as 1/3<sup>rd</sup> of PCV and vice versa [26].

180 Regarding veterinary medical sciences, the only work reported on the interrelationship of  
181 PCV and Hb has been conducted on indigenous African cattle breeds and a formula of  
182  $0.28(PCV) + 3.11$  has been deduced for Hb estimation in g/dLs [9]. Similarly, pen-side  
183 hematological formulae for Hb estimation in goat blood [10] and for the blood of Cholistani  
184 breed of cattle have been reported by us earlier [11]. However, this is the first report on such  
185 interrelationship for camels being reared under pastoralism in Cholistan desert of Pakistan.

## 186 **Conclusions**

187 Summing up, a convention of human clinical medicine that Hb concentration is a  $1/3^{\text{rd}}$  of PCV  
188 and vice versa cannot be implied for the camels. However, a different equation *i.e.*  $\text{Hb (g/dL)} =$   
189  $0.18(\text{PCV})+5.4$  may provide reliable results for Hb estimation from the PCV in this specie. The  
190 results of the study may be of substantial value to the researchers, academicians and veterinary  
191 clinicians of resource-poor areas. It is suggested that other mathematical formulae regarding  
192 hematological attributes being used in human clinical medicine may also be validated for various  
193 use in veterinary medical practice.

#### 194 **Acknowledgements**

195 The authors are grateful to the ‘**Pakistan Science Foundation**’ for provision of research grant  
196 No. PSF/NSLP/P-IUB-931 titled “Devising and Validating Pen-side Hematological Tests as an  
197 Enhanced Approach to the Diagnosis of Anemia in Cholistani Livestock (Camels and Cattle)”.

#### 198 **Author Contributions**

199 **Conceptualization:** Umer Farooq and Mushtaq Lashari

200 **Data curation:** Shahbaz Ahmad and Haroon Rashid

201 **Formal analysis:** Nouman Sajjad, Musadiq Idris and Aisha Mahmood

202 **Investigation:** Nouman Sajjad

203 **Methodology:** Shahbaz Ahmad, Musadiq Idris, Zia Rehman and Aisha Mahmood

204 **Project administration:** Umer Farooq

205 **Resources:** Mushtaq Lashari

206 **Software:** Zia Rehman and Haroon Rashid

207 **Validation:** Musadiq Idris

208 **Writing:** Sajid Hameed;

209 **Review and editing:** Sajid Hameed

210

211 **References**

- 212 1. Bull BS. Recommendations for reference method for the packed cell volume. Lab  
213 Hematol. 2001; 7: 148.
- 214 2. Fairbanks VF, Tefferi A. Normal ranges for packed cell volume and hemoglobin  
215 concentration in adults: relevance to 'apparent polycythemia'. Euro J Haematol. 2000;  
216 65: 285-96.
- 217 3. Ndlovu T, Chimonyo M, Okoh A, Muchenje V, Dzama K, Raats J, Assessing the  
218 nutritional status of beef cattle: current practices and future prospects. Afr J Biotech.  
219 2007; 6: 11-17.
- 220 4. Bull B, Fujimoto K, Houwen B, Klee G, Van Hove L, Van Assendelft O, Bunyaratvej A,  
221 Buttarello M, Davis B, Koepke J. International Council for Standardization in  
222 Haematology (ICSH) recommendations for " surrogate reference" method for the packed  
223 cell volume. Lab Hematol. 2003; 9: 1-9.
- 224 5. Lassen E, Rebar A, Weiser G. Veterinary hematology and clinical chemistry. Williams  
225 and Wilkins, Philadelphia, pp 486-490 Wang KH, Musa HH (2007) The impact of obesity  
226 on serum biochemical components. J Cell Anim Biol. 2004; 1: 8791.
- 227 6. Quintó L, Aponte JJ, Menéndez C, Sacarlal J, Aide P, Espasa M, Mandomando I,  
228 Guinovart C, Macete E, Hirt R. Relationship between haemoglobin and haematocrit in  
229 the definition of anaemia. Trop Med Int Health 2006; 11: 1295-1302.
- 230 7. Carneiro IA, Drakeley CJ, Owusu-Agyei S, Mmbando B, Chandramohan D.  
231 Haemoglobin and haematocrit: is the threefold conversion valid for assessing anaemia in  
232 malaria-endemic settings? Malar J. 2007; 6: 1-5.

- 233 8. Rodríguez-Morales AJ, Sánchez E, Arria M, Vargas M, Piccolo C, Colina R, Franco-  
234 Paredes C. Haemoglobin and haematocrit: the threefold conversion is also non valid for  
235 assessing anaemia in Plasmodium vivax malaria-endemic settings. *Malar J.* 2007; 6: 1-4.
- 236 9. Turkson PK, Ganyo EY. Relationship between haemoglobin concentration and packed  
237 cell volume in cattle blood samples. *Onderstepoort J Vet Res* 2015; 82: 1-5.
- 238 10. Ahmad S, Lashari M, Farooq U. A preliminary study on devising a hematological  
239 formula for estimation of hemoglobin from packed cell volume in beetal goats. *Arq*  
240 *Brasil Med Vet Zootec.* 2022; 74: 77-82.
- 241 11. Ahmad S, Farooq U, Lashari MH, Idris M, Rehman ZU, Khan N, Sajjad N. Devising and  
242 validating a pen-side hematological formula for hemoglobin estimation in Cholistani  
243 cattle. *Trop Anim Health Prod.* 2022; 54: 1-6.
- 244 12. Farooq U, Samad HA, Sher F, Asim M, Khan A. Cholistan and Cholistani breed of cattle.  
245 *Pak Vet J.* 2010; 30: 126-32.
- 246 13. Farooq U, Mahmood SA, Ahmad I, Ahmad N, Idris M, Abbas MT, Evaluation of  
247 postthaw sperm parameters and fertility of Cholistani service bulls. *Turk J Vet Anim Sci.*  
248 2015; 39: 472-79.
- 249 14. Ali I, Chaudhry MS, Farooq U. Camel rearing in Cholistan desert of Pakistan. *Pak Vet J.*  
250 2009; 29: 85-91.
- 251 15. Sari M, Pee SD, Martini E, Herman S, Bloem MW, Yip R. Estimating the prevalence of  
252 anaemia: a comparison of three methods. *Bull World Health Org.* 2001; 79: 506-511.
- 253 16. Bland JM, Altman DG. Measuring agreement in method comparison studies. *Stat*  
254 *Methods Med Res.* 1999; 8: 135-60.

- 255 17. ESP 2020-21. Pakistan Economic Survey 2020-21. In: Finance Division, G.o.P. (Ed.).  
256 Finance Division, Government of Pakistan, Islamabad, pp: 200.
- 257 18. Bakheit M, Latif A. The innate resistance of Kenana cattle to tropical theileriosis  
258 (Theileria annulata infection) in the Sudan. Ann NY Acad Sci. 2002; 969: 159-163.
- 259 19. Grace D, Himstedt H, Sidibe I, Randolph T, Clausen PH. Comparing FAMACHA© eye  
260 color chart and Hemoglobin Color Scale tests for detecting anemia and improving  
261 treatment of bovine trypanosomosis in West Africa. Vet Parasitol. 2007; 147: 26-39.
- 262 20. Mijares A, Vivas J, Abad C, Betancourt M, Piñero S, Proverbio F, Marín R, Portillo R.  
263 Trypanosoma evansi: Effect of experimental infection on the osmotic fragility, lipid  
264 peroxidation and calcium-ATPase activity of rat red blood cells. Exp Parasitol. 2010:  
265 124: 301-5.
- 266 21. Qayyum A, Farooq U, Samad H, Chauhdry H. Prevalence, clinicotherapeutic and  
267 prophylactic studies on theileriosis in district Sahiwal (Pakistan). J Anim Plant Sci. 2010;  
268 20: 266-70.
- 269 22. Farooq U, Ahmad N, Ahmad I, Mahmood SA, Andrabi SMH, Idris M. Effect of seasonal  
270 variations on hematochemical profile of Cholistani service bulls. J Appl Anim Res. 2017;  
271 45: 85-89.
- 272 23. DeNicola DB. Advances in hematology analyzers. Top Companion Anim Med. 2011; 26:  
273 5-61.
- 274 24. Bain BJ, Lewis SM, Bates I. Basic haematological techniques. In Book: Dacie and Lewis  
275 Practical Haematology, Elsevier, 2006; 4: 19-25.
- 276 25. Hippel TG. Hematology: clinical principles and applications. In Book: Routine testing in  
277 hematology, 3rd ed; St. Saunders/Elsevier, Louis, MO, 2007; pp. 160-174.

278           26. O'Connor G, Molloy A, Daly L, Scott J. Deriving a useful packed cell volume estimate  
279                   from haemoglobin analysis. *J Clin Pathol*. 1994; 47: 78-9.  
280  
281  
282  
283  
284

## TABLES

**Table 1. Mean ( $\pm$ SE) values and confidence intervals for hemoglobin determined (HbD), hemoglobin calculated (HbC) and Packed Cell Volume in Cholistani camels (n=215)**

| Groups                 |                 | HbD                            |                  | HbC                            |                 | Sig           | PCV                            |                  |
|------------------------|-----------------|--------------------------------|------------------|--------------------------------|-----------------|---------------|--------------------------------|------------------|
|                        |                 | (g/dL)                         |                  | (g/dL)                         |                 |               | (% )                           |                  |
|                        |                 | x $\pm$ SE                     | CI               | x $\pm$ SE                     | CI              |               | x $\pm$ SE                     | CI               |
| Gender                 | Females (n=121) | 10.8 $\pm$ 0.2                 | 10.4-11.2        | 9.4 $\pm$ 0.2                  | 9.0-9.8         | 0.01*         | 28.3 $\pm$ 0.6                 | 27.2-29.5        |
|                        | Males (n=94)    | 11.2 $\pm$ 0.3                 | 10.7-11.8        | 10.8 $\pm$ 0.4                 | 10.0-11.7       | 0.04*         | 32.6 $\pm$ 1.2                 | 30.1-35.1        |
| Age                    | Young (n=85)    | 11.0 $\pm$ 0.3                 | 10.3-11.6        | 9.3 $\pm$ 0.5                  | 8.2-10.2        | 0.005*        | 27.8 $\pm$ 1.4                 | 24.8-30.7        |
|                        | Adult (n=130)   | 11.1 $\pm$ 0.2                 | 10.7-11.5        | 10.4 $\pm$ 0.3                 | 9.8-11.0        | 0.05*         | 31.3 $\pm$ 0.8                 | 29.6-32.9        |
| <b>Overall (n=215)</b> |                 | <b>11.0<math>\pm</math>0.1</b> | <b>10.7-11.4</b> | <b>10.2<math>\pm</math>0.3</b> | <b>9.7-10.7</b> | <b>0.007*</b> | <b>30.7<math>\pm</math>0.7</b> | <b>29.2-32.1</b> |

\*Significant at  $P \leq 0.05$  within rows for each group between hemoglobin determined and hemoglobin calculated.

HbD= Hemoglobin determined spectrophotometrically; HbC= Hemoglobin calculated as  $1/3^{\text{rd}}$  of PCV; PCV= Packed cell volume



**Table 2. Linear regression between various hematological attributes for Cholistani camels (n=215)**

| <b>Groups</b>          |                 | <b>HbD vs PCV</b>     | <b>HbD vs HbC</b>    | <b>r</b>      | <b>Adjusted<br/>r Square</b> |
|------------------------|-----------------|-----------------------|----------------------|---------------|------------------------------|
| Gender                 | Females (n=121) | y= 0.23; x+4.3        | y= 0.7; x+4.3        | 0.654*        | 0.41                         |
|                        | Males (n=94)    | y= 0.20; x+5.3        | y= 0.54; x+5.3       | 0.79*         | 0.62                         |
| Age                    | Young (n=85)    | y= 0.19; x+5.8        | y= 0.60; x+5.8       | 0.830*        | 0.68                         |
|                        | Adult (n=130)   | y= 0.19; x+5.3        | y= 0.60; x+5.3       | 0.751*        | 0.56                         |
| <b>Overall (n=215)</b> |                 | <b>y= 0.18; x+5.4</b> | <b>y= 0.55 x+5.5</b> | <b>0.753*</b> | <b>0.56</b>                  |

\*Significant correlation at  $P \leq 0.01$ .

HbD= Hemoglobin determined spectrophotometrically; HbC= Hemoglobin calculated as 1/3rd of PCV; PCV= Packed cell volume

## FIGURES

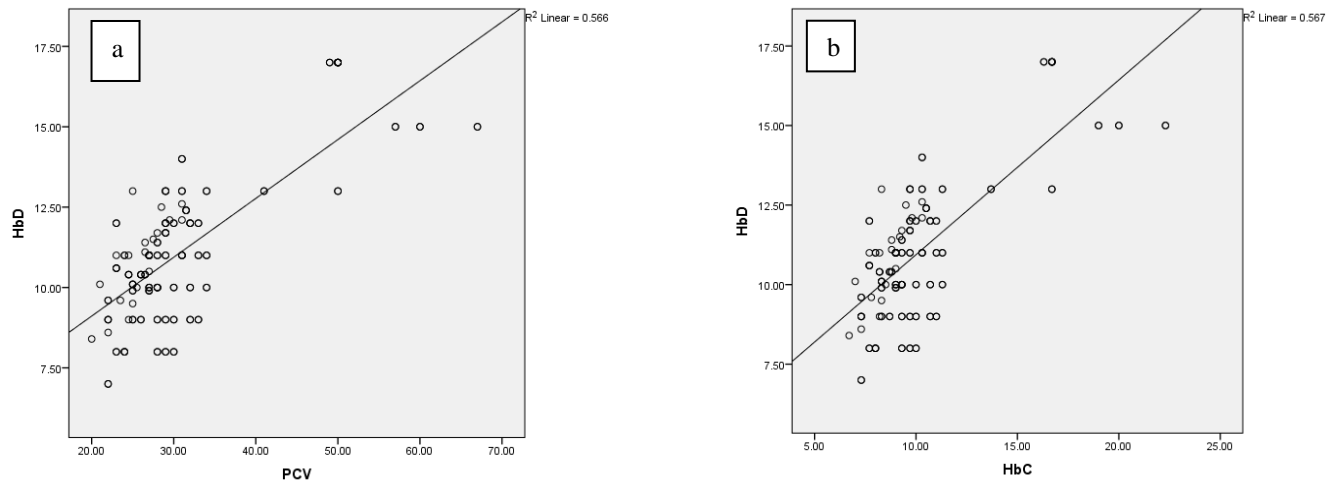

**Figure 1:** Scatterplot for logilinear regression between a) hemoglobin determined spectrophotometrically (HbD) and Packed Cell Volume (PCV) ( $n= 215$ ;  $r= 0.753$ ), and b) between hemoglobin determined spectrophotometrically (HbD) and hemoglobin calculated as one-third of Packed Cell Volume (HbC) ( $n= 215$ ;  $r= 0.753$ ) in Cholistani camels ( $n=215$ )

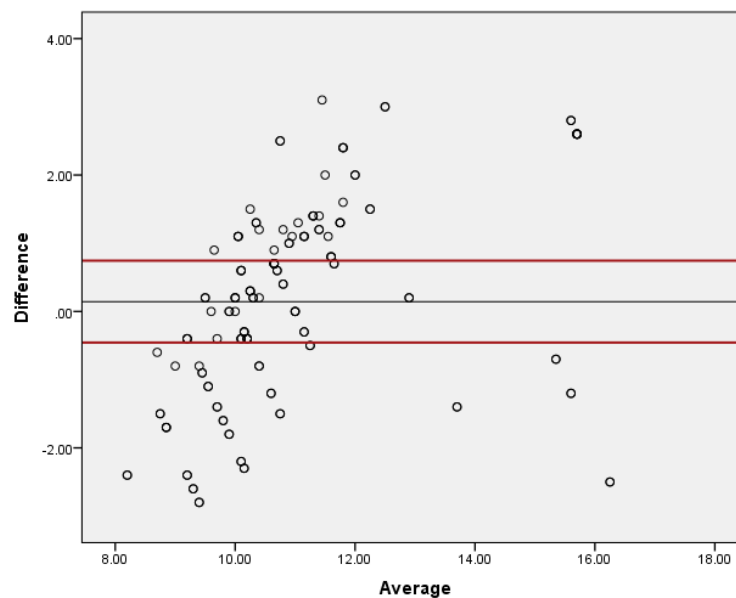

**Figure 2:** Scatterplot of Bland and Altman test between difference of hemoglobin determined spectrophotometrically and corrected hemoglobin (HbD-CHbC) and average of both hemoglobins ( $(HbD+CHbC)/2$ ) in Cholistani camels ( $n= 215$ ) Black line indicates mean difference (0.1436) whereas the upper and lower red lines indicate upper (3.00) and lower (-2.72) values for 95% CI
